# Supplementary material for: Emissions Preparation and Analysis for Multiscale AirQuality Modelling over the Athabasca Oil Sands Region ofAlberta, Canada
Source: Copernicus journal article supplement (doi:10.5194/acp-2017-1215), 2018-02-13
Supplement: Supplementary file 1 [file acp-2017-1215-supplement.pdf]

Supplement for:

# Emissions Preparation and Analysis for Multiscale Air Quality Modelling over the Athabasca Oil Sands Region of Alberta, Canada

5 Junhua Zhang<sup>1</sup>, Michael D. Moran<sup>1</sup>, Qiong Zheng<sup>1</sup>, Paul A. Makar<sup>1</sup>, Pegah Baratzadeh<sup>2</sup>,  
George Marson<sup>3</sup>, Peter Liu<sup>1</sup>, and Shao-Meng Li<sup>1</sup>

<sup>1</sup>Air Quality Research Division, Environment and Climate Change Canada, 4905 Dufferin Street, Toronto, ON, Canada

<sup>2</sup>Pollutant Inventories and Reporting Division, ECCC, 4905 Dufferin Street, Toronto, ON, Canada

<sup>3</sup>Air Quality Research Division, ECCC, 335 River Road, Ottawa, ON, Canada

Correspondence to: junhua.zhang@canada.ca

## 10 Table S1: List of acronyms used in paper.

|          |                                                                             |
|----------|-----------------------------------------------------------------------------|
| AAEI     | Alberta Air Emissions Inventory                                             |
| ADOM-2   | Acid Deposition and Oxidant Model, version 2                                |
| AEP      | Alberta Environment and Parks (formerly AESRD)                              |
| AER      | Alberta Energy Regulator                                                    |
| AESRD    | Alberta Environment and Sustainable Resource Development (now AEP)          |
| AOSR     | Athabasca Oil Sands Region                                                  |
| APEI     | Air Pollutant Emission Inventory                                            |
| AQ       | air quality                                                                 |
| BEIS     | Biogenic Emission Inventory System                                          |
| BELD     | Biogenic Emissions Landuse Database                                         |
| CAC      | criteria air contaminants                                                   |
| CEMA     | Cumulative Environmental Management Association                             |
| CEMS     | Continuous Emission Monitoring System                                       |
| CNRL     | Canadian Natural Resources Limited                                          |
| ECCC     | Environment and Climate Change Canada                                       |
| EIA      | environmental impact assessment                                             |
| EPA      | Environmental Protection Agency (U.S.)                                      |
| EPEA     | Environmental Protection and Enhancement Act (Alberta)                      |
| GEM-MACH | Global Environmental Multiscale model – Modelling Air-quality and Chemistry |
| GIS      | geographic information system                                               |

|       |                                            |
|-------|--------------------------------------------|
| JOSM  | Joint Oil Sands Monitoring plan            |
| LAI   | Leaf Area Index                            |
| LARP  | Lower Athabasca Regional Plan              |
| NEI   | National Emissions Inventory               |
| NPRI  | National Pollutant Release Inventory       |
| OS    | oil sands                                  |
| PM    | particulate matter                         |
| SCC   | Source Classification Code                 |
| SMOKE | Sparse Matrix Operator Kernel Emissions    |
| TERRA | Top-Down Emission Rate Retrieval Algorithm |
| UOG   | upstream oil and gas                       |
| VOC   | volatile organic compound                  |
| WBEA  | Wood Buffalo Environmental Association     |

**Table S2: Emissions inventories reviewed in Phase 1 prior to the 2013 AOSR field study.**

| <b>Inventory Name</b>                                                                                                       | <b>Geographic Coverage</b>               | <b>Base Year</b> |
|-----------------------------------------------------------------------------------------------------------------------------|------------------------------------------|------------------|
| Cumulative Environmental Management Association (CEMA) Air Working Group Emission Inventory                                 | Lower Athabasca Region of Alberta        | 2009/2010        |
| Lower Athabasca Regional Plan (LARP) Emissions Inventory                                                                    | Lower Athabasca Region of Alberta        | 2006             |
| Environmental Protection and Enhancement Act (EPEA) Approvals Emissions Data                                                | entire province of Alberta               | 2010             |
| Alberta Industrial Air Emissions Survey                                                                                     | entire province of Alberta               | 2010             |
| Alberta Air Emissions Inventory (AAEI)                                                                                      | entire province of Alberta               | 2006-2008        |
| Canadian National Pollutant Release Inventory (NPRI)                                                                        | all of Canada                            | 2010             |
| Canadian Air Pollutant Emission Inventory (APEI, (not an AQ-modelling-ready version, NPRI is a subset of APEI)              | all of Canada                            | 2010             |
| Wood Buffalo Emissions Inventory                                                                                            | WBEA Airshed Zone of Alberta             | 2005/2006        |
| Two EPEA Approval Applications / Environmental Impact Assessments (EIA) emissions inventories (Frontier and Voyageur South) | project-specific area coverage (Alberta) | various years    |

5 **Table S3: Annual facility-total CO, NO<sub>x</sub>, PM<sub>10</sub>, PM<sub>2.5</sub>, and SO<sub>2</sub> off-road vehicle tail-pipe emissions (tonnes) from 2010 CEMA inventory. These emissions were used for all three phases. (Note: a) PM<sub>10</sub> emissions were estimated based on the PM<sub>2.5</sub> emissions and the typical PM<sub>10</sub> to PM<sub>2.5</sub> ratio for similar type of off-road vehicles; b) emissions for the Imperial Oil Kearn facility were estimated based on mined oil sands statistics for 2013; and c) off-road VOC emissions are included in this table because they are not included in Table 2 as they are not required for NPRI reporting.)**

| <b>Facility Name</b>        | <b>CO</b>     | <b>NO<sub>x</sub></b> | <b>PM<sub>10</sub></b> | <b>PM<sub>2.5</sub></b> | <b>SO<sub>2</sub></b> | <b>VOC</b>   |
|-----------------------------|---------------|-----------------------|------------------------|-------------------------|-----------------------|--------------|
| Suncor Millenium/Steepbank  | 9,087         | 10,768                | 484                    | 444                     | 62                    | 1,173        |
| Syncrude Mildred Lake       | 1,931         | 8,030                 | 194                    | 178                     | 365                   | 332          |
| Syncrude Aurora North       | 1,341         | 7,045                 | 159                    | 146                     | 117                   | 219          |
| Shell Muskeg River/Jackpine | 4,577         | 6,935                 | 225                    | 206                     | 128                   | 653          |
| CNRL Horizon                | 602           | 5,585                 | 38                     | 35                      | 66                    | 134          |
| Imperial Oil Kearn          | 505           | 1,258                 | 33                     | 30                      | 26                    | 75           |
| <b>Total</b>                | <b>18,042</b> | <b>39,620</b>         | <b>1,132</b>           | <b>1,039</b>            | <b>763</b>            | <b>2,585</b> |

**Table S4: Annual facility-total CO, NH<sub>3</sub>, NO<sub>x</sub>, PM<sub>10</sub>, PM<sub>2.5</sub>, and SO<sub>2</sub> emissions (tonnes) from stacks and area sources, except for road dust emissions from the off-road mining fleet, by phase for the three phases (P1, P2, P3).**

| <b>Species &amp; Phase / Facility Name</b> | <b>Suncor Millenium/ Steepbank</b> | <b>Syncrude Mildred Lake</b> | <b>Syncrude Aurora North</b> | <b>Shell Muskeg River/Jackpine</b> | <b>CNRL Horizon</b> | <b>Imperial Oil Kearn</b> | <b>TOTAL</b> |                |
|--------------------------------------------|------------------------------------|------------------------------|------------------------------|------------------------------------|---------------------|---------------------------|--------------|----------------|
| <b>CO</b>                                  | P1                                 | 3,080                        | 5,196                        | 883                                | 107                 | 2,785                     | 0            | <b>12,051</b>  |
|                                            | P2                                 | 3,080                        | 5,196                        | 883                                | 107                 | 2,785                     | 484          | <b>12,535</b>  |
|                                            | P3                                 | 6,096                        | 5,184                        | 343                                | 57                  | 1,353                     | 484          | <b>13,517</b>  |
| <b>NH<sub>3</sub></b>                      | P1                                 | 0                            | 0                            | 0                                  | 0                   | 0                         | 0            | <b>0</b>       |
|                                            | P2                                 | 1                            | 1,436                        | 0                                  | 0                   | 174                       | 0            | <b>1,612</b>   |
|                                            | P3                                 | 1                            | 1,436                        | 0                                  | 0                   | 174                       | 0            | <b>1,612</b>   |
| <b>NO<sub>x</sub></b>                      | P1                                 | 11,526                       | 14,003                       | 561                                | 696                 | 1,841                     | 0            | <b>28,629</b>  |
|                                            | P2                                 | 11,526                       | 14,003                       | 561                                | 696                 | 1,841                     | 256          | <b>28,884</b>  |
|                                            | P3                                 | 7,848                        | 13,900                       | 519                                | 1,064               | 1,472                     | 256          | <b>25,059</b>  |
| <b>PM<sub>10</sub></b>                     | P1                                 | 804                          | 4,166                        | 69                                 | 26                  | 243                       | 0            | <b>5,308</b>   |
|                                            | P2                                 | 804                          | 4,166                        | 69                                 | 26                  | 243                       | 75           | <b>5,382</b>   |
|                                            | P3                                 | 564                          | 2,221                        | 8                                  | 35                  | 195                       | 75           | <b>3,098</b>   |
| <b>PM<sub>2.5</sub></b>                    | P1                                 | 460                          | 1,538                        | 69                                 | 23                  | 243                       | 0            | <b>2,332</b>   |
|                                            | P2                                 | 460                          | 1,538                        | 69                                 | 23                  | 243                       | 73           | <b>2,406</b>   |
|                                            | P3                                 | 340                          | 635                          | 7                                  | 19                  | 158                       | 73           | <b>1,233</b>   |
| <b>SO<sub>2</sub></b>                      | P1                                 | 20,619                       | 77,120                       | 0                                  | 0                   | 6,512                     | 0            | <b>104,251</b> |
|                                            | P2                                 | 20,619                       | 77,120                       | 0                                  | 0                   | 6,512                     | 0            | <b>104,251</b> |
|                                            | P3                                 | 13,868                       | 63,321                       | 0                                  | 0                   | 4,005                     | 0            | <b>81,194</b>  |

**Table S5: Annual facility-total PM10 and PM2.5 fugitive dust emissions from the off-road mining fleet (tonnes) for the three phases.**

| <b>Facility Name</b>    | Suncor Millenium/ Steepbank | Syncrude Mildred Lake | Syncrude Aurora North | Shell Muskeg River/Jackpine | CNRL Horizon | Imperial Oil Kearl | <b>TOTAL</b> |               |
|-------------------------|-----------------------------|-----------------------|-----------------------|-----------------------------|--------------|--------------------|--------------|---------------|
| <b>PM<sub>10</sub></b>  | P1                          | 4,086                 | 1,958                 | 1,702                       | 972          | 1,642              | 0            | <b>10,361</b> |
|                         | P2                          | 4,667                 | 2,091                 | 954                         | 2,330        | 2,099              | 8,236        | <b>20,377</b> |
|                         | P3                          | 4,667                 | 2,091                 | 954                         | 2,330        | 2,099              | 8,236        | <b>20,377</b> |
| <b>PM<sub>2.5</sub></b> | P1                          | 409                   | 196                   | 170                         | 97           | 164                | 0            | <b>1,037</b>  |
|                         | P2                          | 467                   | 209                   | 95                          | 233          | 210                | 2,921        | <b>4,134</b>  |
|                         | P3                          | 467                   | 209                   | 95                          | 233          | 210                | 2,921        | <b>4,134</b>  |

5

10

15

20

25

5

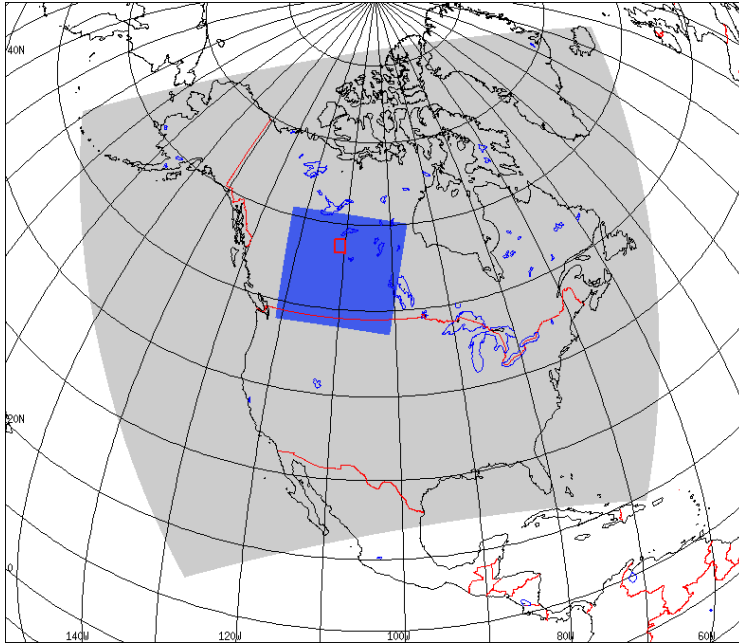

10

15

**Figure S1:** Locations of the North American continental model grid with 10-km grid spacing (grey), the OS western Canada grid with 2.5-km grid spacing (blue), and the subgrid shown in Figures 5 and 7 (red).

20

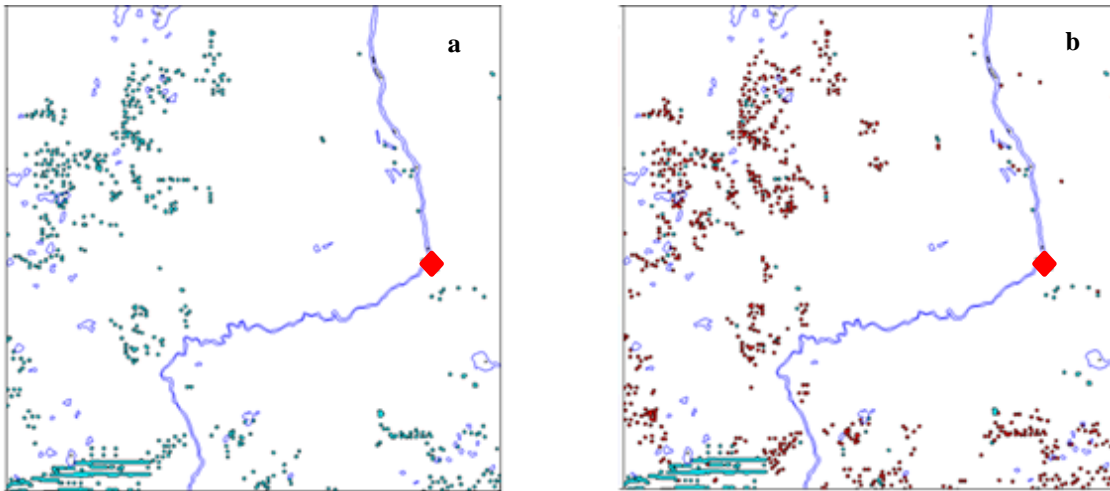

25

30

**Figure S2:** Location of UOG facilities in the Fort McMurray AOSR area from (a) the 2000-based projected 2010 inventory and (b) the 2011-based projected 2013 inventory (red dots) superposed on the 2000-based projected 2010 inventory (cyan dots). The location of Fort McMurray is marked by the diamond symbol.

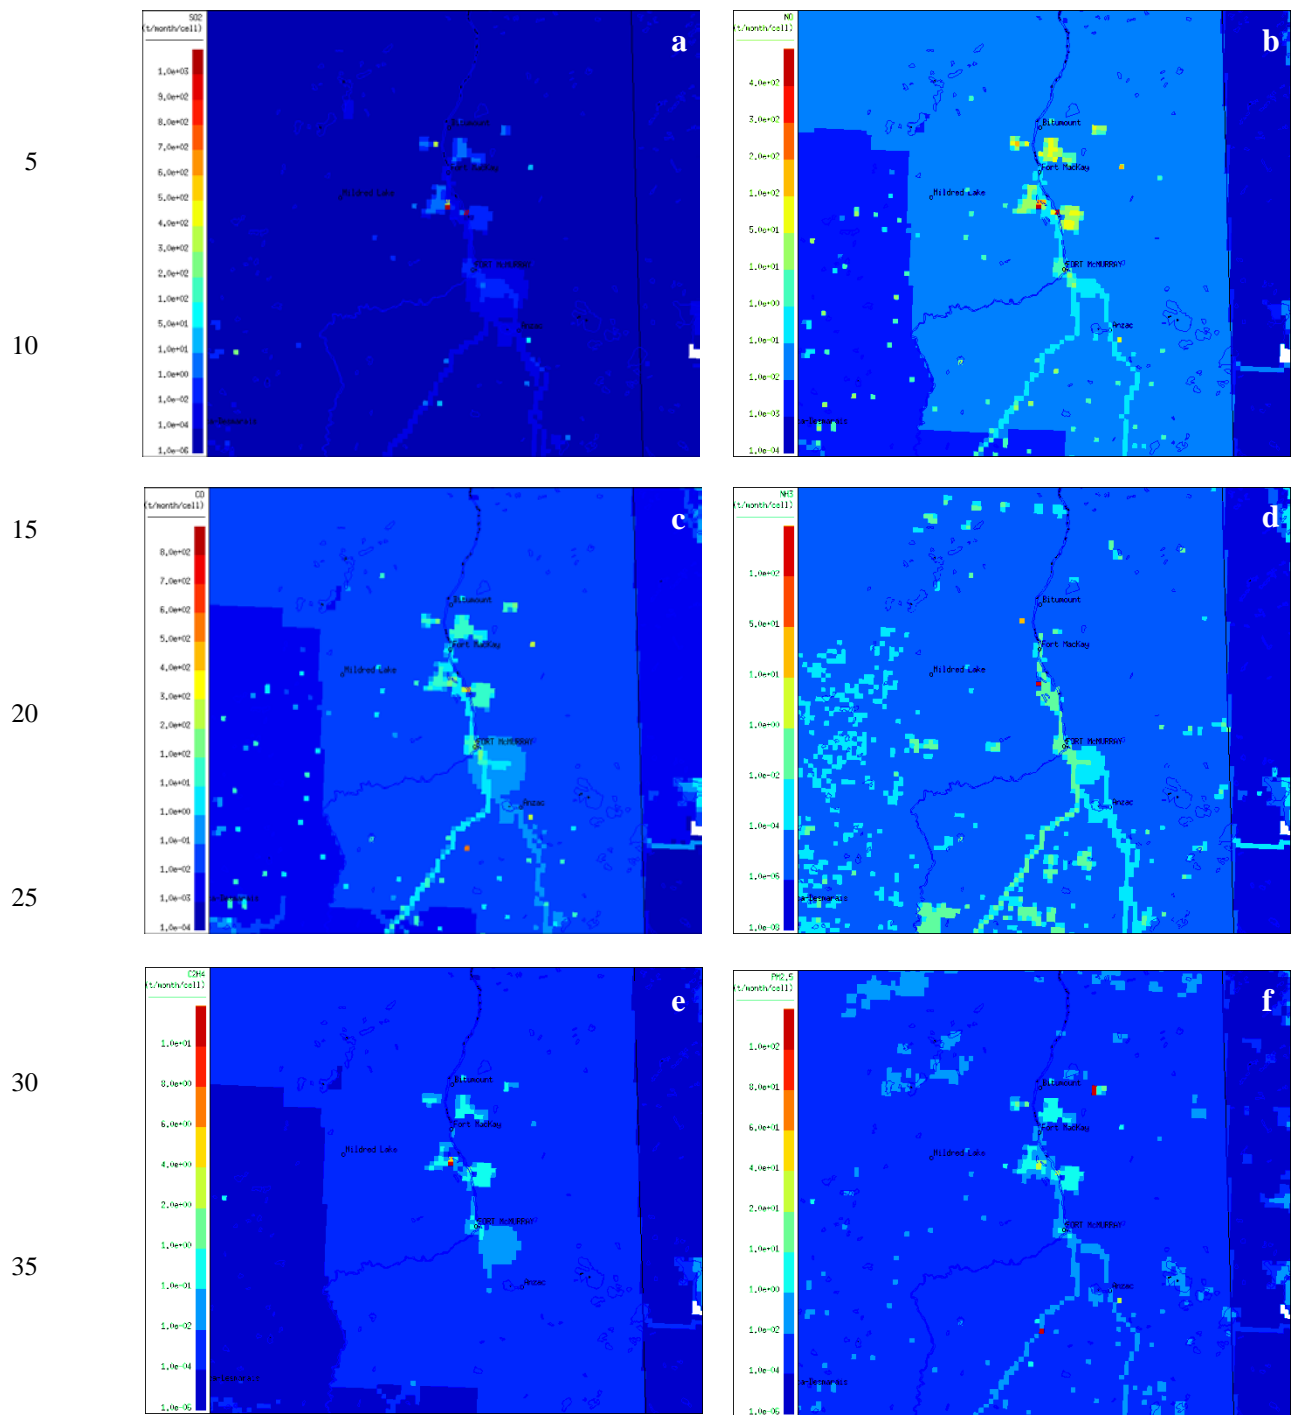

40 **Figure S3: Phase 3 August monthly emissions fluxes (tonnes month<sup>-1</sup> grid-cell<sup>-1</sup>) on an interior portion of the OS 2.5-km grid centred on the AOSR study area of the following GEM-MACH species: (a) SO<sub>2</sub>; (b) NO; (c) CO; (d) NH<sub>3</sub>; (e) PM<sub>2.5</sub>; and (f) C<sub>2</sub>H<sub>4</sub> (ethene or ethylene).**

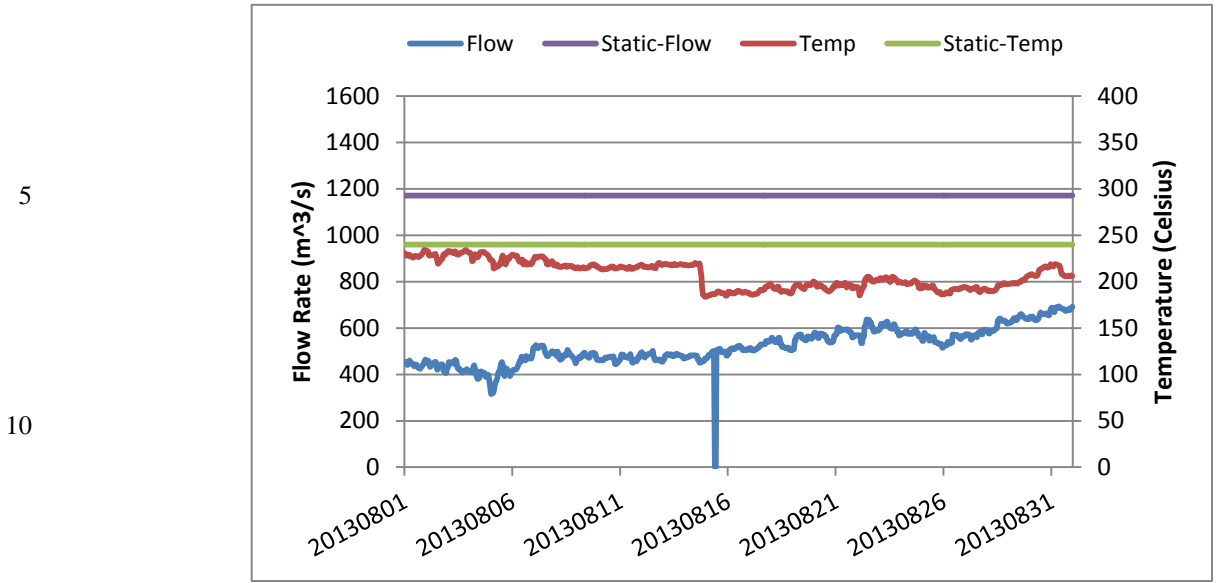

Figure S4: CEMS-measured hourly and NPRI static exit temperature ( $^{\circ}\text{C}$ ) and volume flow rate ( $\text{m}^3\text{s}^{-1}$ ) for the Main stack of the Syncrude Mildred Lake facility for August 2013. Note that CEMS measurements are not available for some hours due to instrument calibration or other interruptions (e.g., flow rate on August 15). Those missing data have been filled by averaging the available data before and after the missing hours.

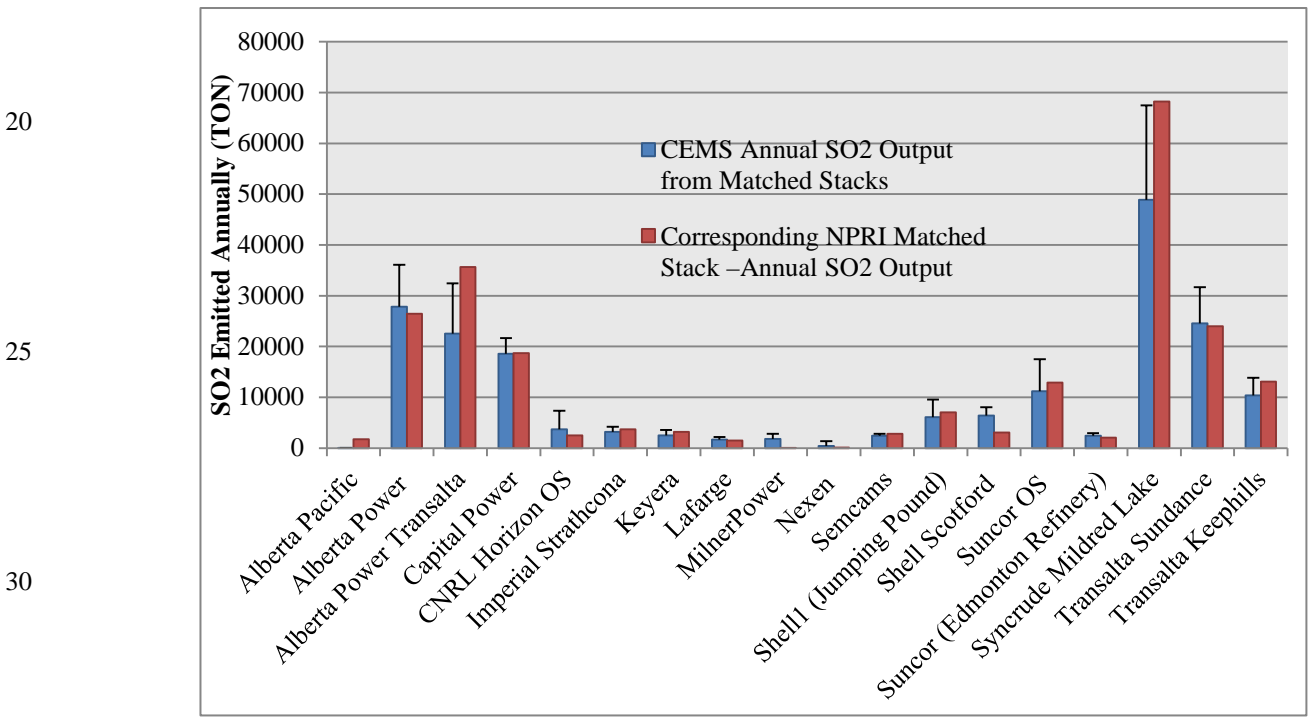

Figure S5: Comparison of annual  $\text{SO}_2$  emissions estimated from CEMS measurements at 18 facilities and reported to NPRI for 2013. The error bars shown on the CEMS data represent the standard deviation of the hourly CEMS data measured for August and September, 2013.

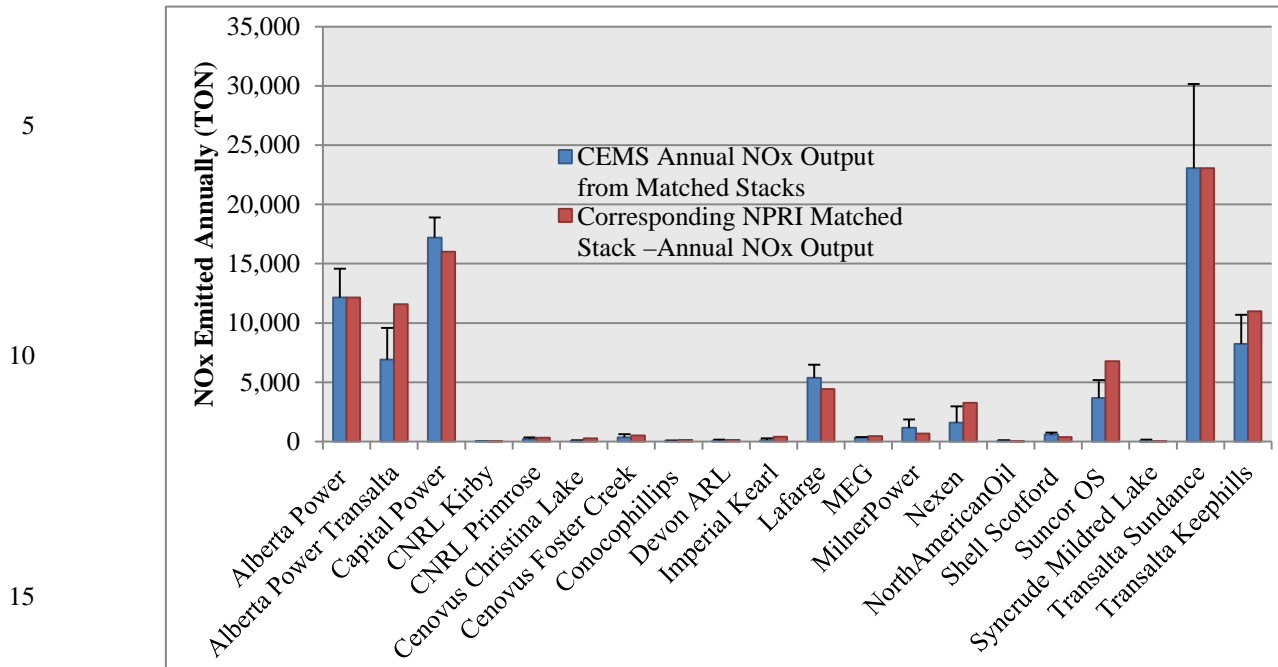

Figure S6: Same as Figure S5, but for NOx comparison and 20 facilities.

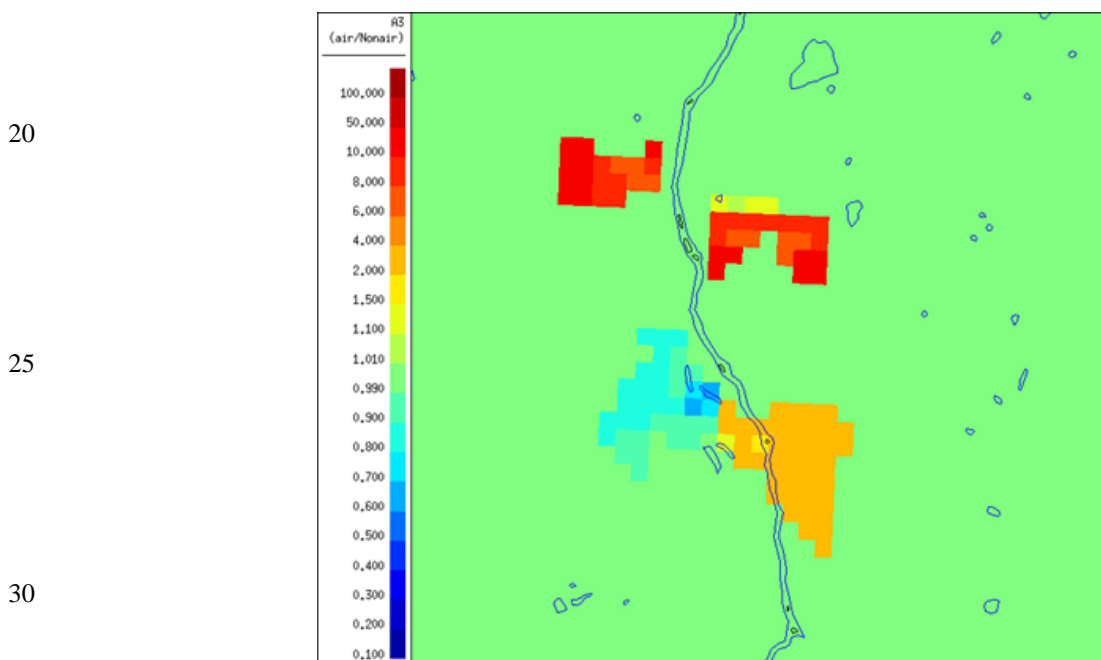

Figure S7: Ratio of gridded model-ready aircraft-observation-based ADOM-2 higher-alkane emissions to the base-case emissions for the GEM-MACH 2.5-km grid over the AOSR area.



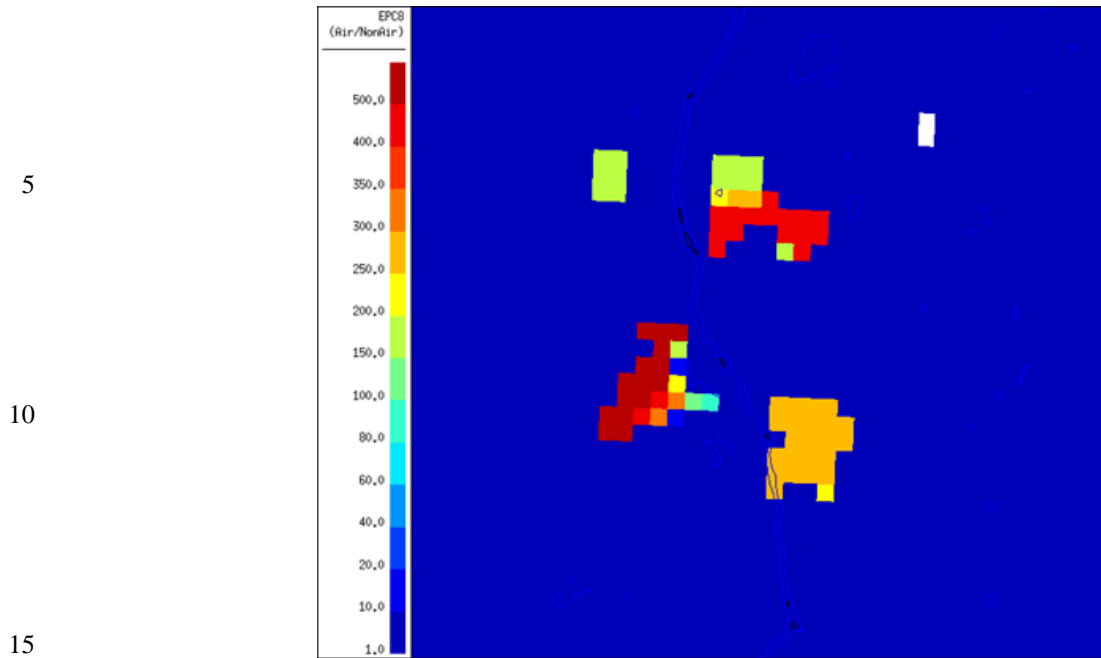

**Figure S8: Ratio of gridded, model-ready aircraft-observation-based (size) Bin 8 OM emissions to the base-case emissions for the GEM-MACH 2.5-km grid over the AOSR study area.**

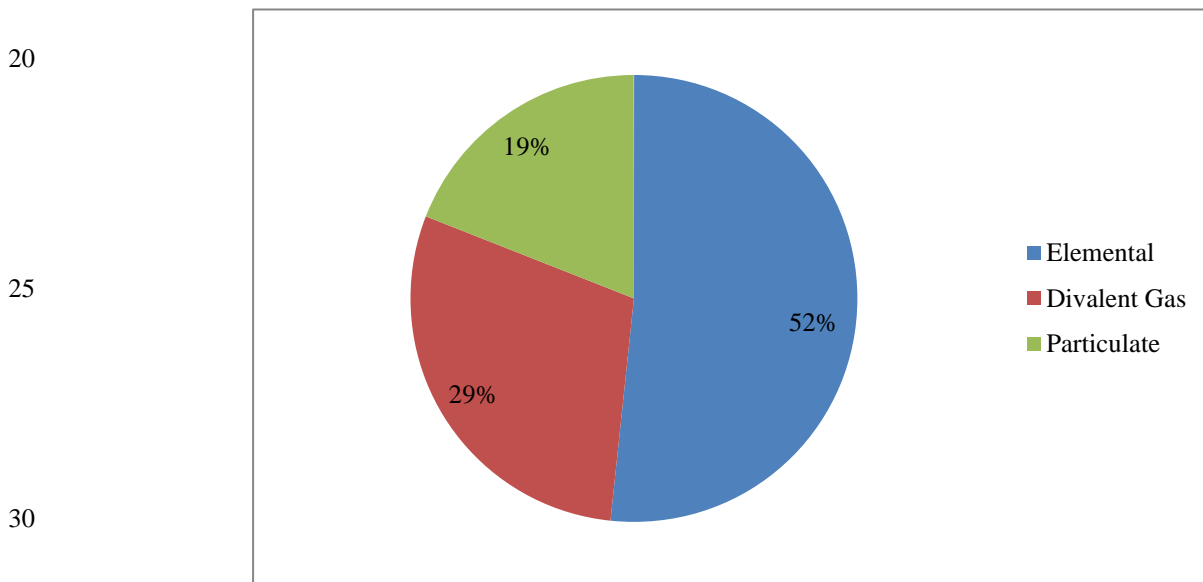

**Figure S9: Domain-average percentages of the three speciated mercury species for Phase 3 emissions.**
